# Supplementary material for: Effect of hydrothermal processing on ginseng extract
Source: PubMed Central journal article supplement — J Ginseng Res. 2016 Dec 8;41(4):572–7. doi: 10.1016/j.jgr.2016.12.002 (PMC5628343; doi:10.1016/j.jgr.2016.12.002), 2016-12-08

**Supplementary Table 1.** Yields of 20(S)-Rg3, Rk1, and Rg5 in red ginseng and sun ginseng ( $n = 3$ )

|             | 20(S)-Rg3       | Rk1             | Rg5             |
|-------------|-----------------|-----------------|-----------------|
| Control     | (mg/g dw)       | (mg/g dw)       | (mg/g dw)       |
| Red ginseng | $0.29 \pm 0.02$ | $0.19 \pm 0.03$ | $0.43 \pm 0.06$ |
| Sun ginseng | $1.48 \pm 0.07$ | $1.86 \pm 0.05$ | $3.71 \pm 0.10$ |

dw, dry weight.

**Supplementary Table 2.** Antioxidant activities of the control group ( $n = 3$ )

| Control     | Total phenol    | TEAC ( $\mu$ M Trolox/100 g |                 |
|-------------|-----------------|-----------------------------|-----------------|
|             | content         | dw)                         |                 |
|             | (mg GA/g dw)    | ABTS                        | DPPH            |
| Red ginseng | $2.09 \pm 0.08$ | $70.5 \pm 4.29$             | $19.2 \pm 1.26$ |
| Sun ginseng | $5.27 \pm 0.09$ | $86.5 \pm 1.17$             | $38.4 \pm 0.48$ |

ABTS, 2,2'-azino-bis (3-ethylbenzothiazole-6-sulfonic acid); DPPH, 2,2-diphenyl-1-picrylhydrazyl; GA, gallic acid; TEAC, trolox equivalent antioxidant capacity.

**Supplementary Table 3.** Elemental analysis of ginseng extract and ginseng powder ( $n = 3$ )

| Element  | Ginseng extract (wt%) | Ginseng powder (wt%) |
|----------|-----------------------|----------------------|
| Nitrogen | $0.81 \pm 0.02$       | $1.89 \pm 0.04$      |
| Carbon   | $41.8 \pm 0.17$       | $43.2 \pm 0.07$      |
| Hydrogen | $7.11 \pm 0.04$       | $6.33 \pm 0.01$      |

wt, weight.

### Supplementary data

**Supplementary Fig. 1.** Transformation process of protopanaxadiol-type intact ginsenosides.

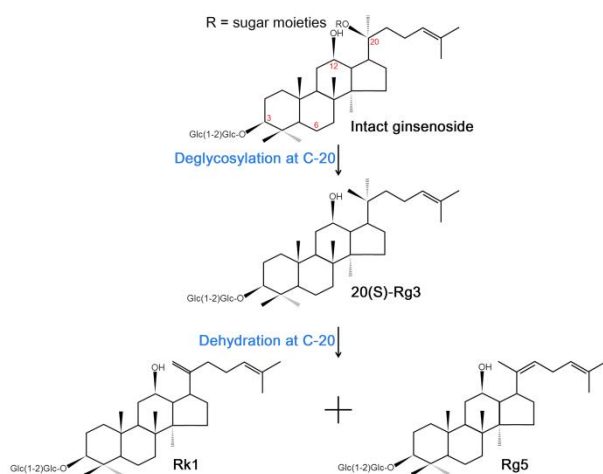

**Supplementary Fig. 2.** (A) HPLC chromatograms of unprocessed ginseng extract. (B) HPLC chromatograms of hydrothermally processed ginseng extract.

PPD, protopanaxadiol.

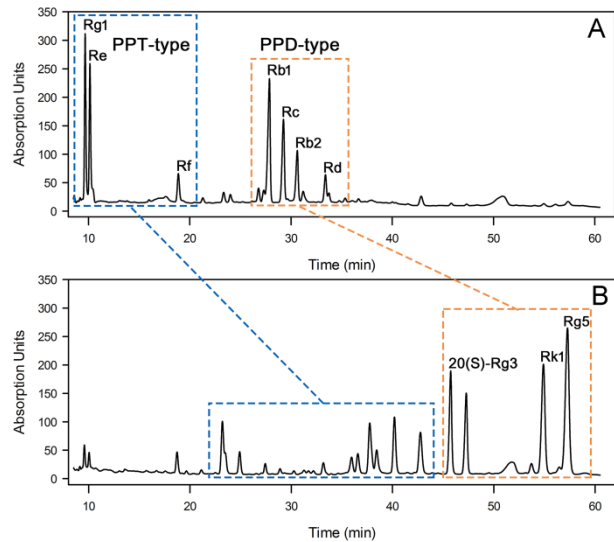

**Supplementary Fig. 3.** Linear relation between the natural logarithm of the reaction time and the temperature in the hydrothermal process.

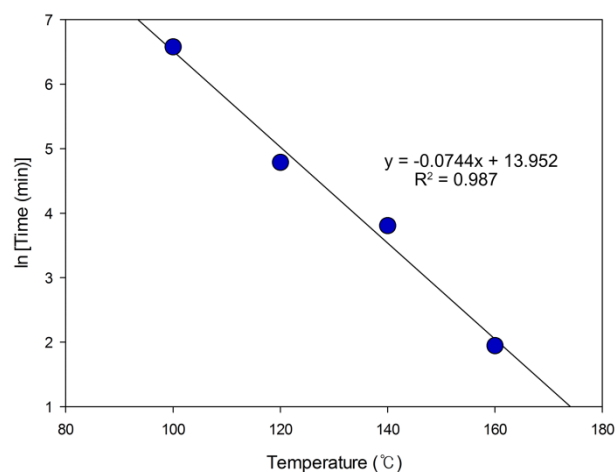

**Supplementary Fig. 4.** Antioxidant activities of hydrothermally reacted samples obtained by

evaluating the (A) total phenol content, (B) ABTS radical cation scavenging, and (C) DPPH radical scavenging.

ABTS, 2,2'-azino-bis (3-ethylbenzothiazole-6-sulfonic acid); DPPH, 2,2-diphenyl-1-picrylhydrazyl; dw, dry weight; TEAC, trolox equivalent antioxidant capacity.

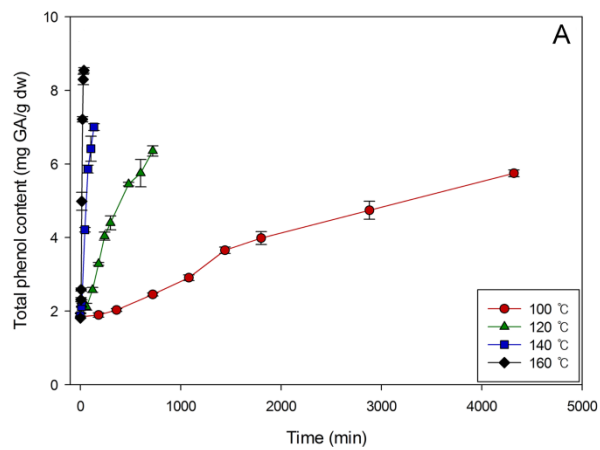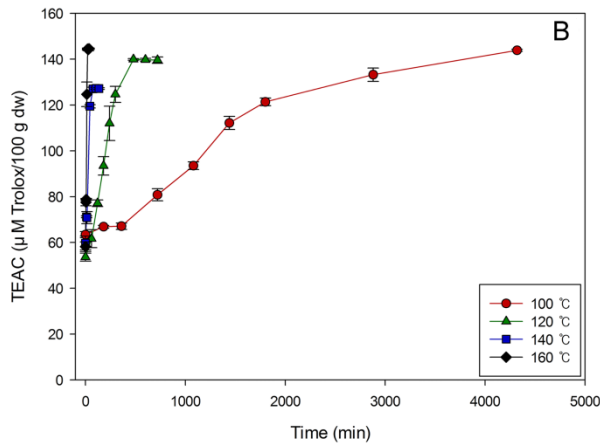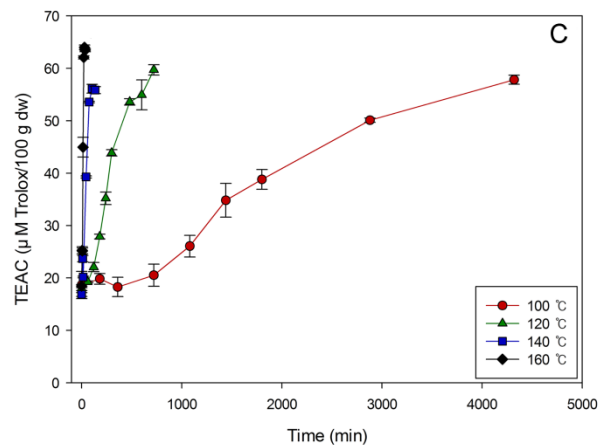

Supplement: mmc1.pdf [file mmc1.pdf]
